# Supplementary material for: Hypertension among adolescents in Nigeria: a retrospective study of adolescent university freshmen
Source: publisher site journal article supplement (doi:10.1515/ijamh-2018-0287), 2019-03-15
Supplement: Supplementary file 1 [file Online Appendix.pdf › Online Appendix.pdf]

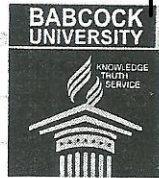

# Appendix I

## BABCOCK UNIVERSITY

ILISHAN-REMO, OGUN STATE  
NIGERIA, WEST AFRICA

TBC \_\_\_\_\_

LAB \_\_\_\_\_

PE \_\_\_\_\_

Consent \_\_\_\_\_

Admissions notified \_\_\_\_\_

### Applicant Medical Report Form

Student or parents fill out this side. The information you provide will help us prepare adequately for health needs.

Name \_\_\_\_\_

Last

First

Middle

Birth date \_\_\_\_\_

Month

Day

Year

Marital status: Single \_\_\_\_\_ Married \_\_\_\_\_ Divorced \_\_\_\_\_ Separated \_\_\_\_\_ Sex \_\_\_\_\_

Religion \_\_\_\_\_ Ethnic background or tribe \_\_\_\_\_

Home address \_\_\_\_\_ City \_\_\_\_\_ State \_\_\_\_\_

Course of study \_\_\_\_\_ Department \_\_\_\_\_

Whom to notify in emergency: Name \_\_\_\_\_ Phone No: \_\_\_\_\_ Relationship \_\_\_\_\_

Address \_\_\_\_\_

Town \_\_\_\_\_ State \_\_\_\_\_

**Personal History:** Tick (v) to indicate you have any of the medical conditions

Yes

No

Yes

No

Yes

No

|                     |       |       |                     |       |       |                 |       |       |
|---------------------|-------|-------|---------------------|-------|-------|-----------------|-------|-------|
| Allergy             | _____ | _____ | Fatigue/excessive   | _____ | _____ | Mumps           | _____ | _____ |
| Anemia              | _____ | _____ | Measles             | _____ | _____ | Nervousness     | _____ | _____ |
| Anxiety/tension     | _____ | _____ | Glandular disorder  | _____ | _____ | Poliomyelitis   | _____ | _____ |
| Arthritis           | _____ | _____ | Hay Fever           | _____ | _____ | Scarlet fever   | _____ | _____ |
| Asthma              | _____ | _____ | Headache            | _____ | _____ | Sleeplessness   | _____ | _____ |
| Back trouble        | _____ | _____ | Heart disease       | _____ | _____ | Tonsillitis     | _____ | _____ |
| Brain concussion    | _____ | _____ | Hepatitis           | _____ | _____ | Typhoid         | _____ | _____ |
| Cancer              | _____ | _____ | Hernia/rupture      | _____ | _____ | Whooping cough  | _____ | _____ |
| Chickenpox          | _____ | _____ | High blood pressure | _____ | _____ | Nervous disease | _____ | _____ |
| Colds, frequent     | _____ | _____ | Influenza           | _____ | _____ | Pneumonia       | _____ | _____ |
| Constipation        | _____ | _____ | Jaundice            | _____ | _____ | Rheumonia       | _____ | _____ |
| Diabetes            | _____ | _____ | meningitis          | _____ | _____ | Sinusitis       | _____ | _____ |
| Epilepsy/convulsion | _____ | _____ | Mental disease      | _____ | _____ | Sore throat     | _____ | _____ |
| Eczema              | _____ | _____ | Mononucleosis       | _____ | _____ | Ulcer           | _____ | _____ |
| Fainting            | _____ | _____ | Others              | _____ | _____ |                 |       |       |
| HIV                 | _____ | _____ |                     |       |       |                 |       |       |

#### Immunizations History:

Date

1. Tetanus/Diphtheria toxoid \_\_\_\_\_
2. Polio \_\_\_\_\_
3. State others \_\_\_\_\_

#### Menstrual History

Painful menses Yes \_\_\_\_\_ No \_\_\_\_\_

Excessive menstrual flow Yes \_\_\_\_\_ No \_\_\_\_\_

Duration of flow in days \_\_\_\_\_

Length of cycle in days \_\_\_\_\_

Age at menarche \_\_\_\_\_

Do you take any medicine regularly? Yes \_\_\_\_\_ No \_\_\_\_\_ If so, state \_\_\_\_\_

Have you ever had an allergy reaction to serum or drugs? Yes \_\_\_\_\_ No \_\_\_\_\_, if yes, please state \_\_\_\_\_



Do you have any emotional or stress problems for which you wish to see a counsellor? Yes \_\_\_\_\_ No \_\_\_\_\_

Any physical handicaps? \_\_\_\_\_

Accident or fractures in the past \_\_\_\_\_ Surgery Yes \_\_\_\_\_ No \_\_\_\_\_

The undersigned parent or guardian of the above named student do hereby authorize any officer or member of the faculty of the Babcock University as my agent, in the case of illness or injury to consent to any x-ray examination, anaesthetic, medical or surgical diagnosis or treatment and hospital service which is deemed advisable by and to be tendered under the general or special supervision of a licensed physician: M.D. whether such diagnosis or treatment is rendered at the office of the said physician or at a hospital. Consent is hereby granted by the undersigned to the Babcock University teaching Hospital to release all pertinent medical histories and physical finding to the aforementioned physician. Consent is also hereby granted by the undersigned to the Babcock University teaching Hospital to give immunization for Polio, Smallpox, Tetanus, Diphtheria, Typhoid and Para typhoid to the aforementioned minor.

Date \_\_\_\_\_ Student (Minor) \_\_\_\_\_

Witness \_\_\_\_\_ Father, Mother, OR Guardian \_\_\_\_\_

#### PHYSICAL EXAMINATION

|                           |                         |
|---------------------------|-------------------------|
| Temperature _____         | Tonsils _____           |
| Respiratory _____         | Skin _____              |
| Pulse _____               | Lymphatics _____        |
| Blood pressure _____      | Thyroid _____           |
| Height (m) _____          | Heart _____             |
| Weight (kg) _____         | Lungs _____             |
| Hip circumference _____   | Breasts _____           |
| Waist circumference _____ | Abdomen _____           |
| Hearing _____             | Genito Urinary _____    |
| Vision _____              | Upper Extremities _____ |
| Nose _____                | Lower Extremities _____ |
| Sinuses _____             | Neurological _____      |
| Mouth _____               | Feet _____              |
| Teeth _____               | Spine _____             |

#### Laboratory Findings: (note: the following must be within the past year.)

|                      |                   |
|----------------------|-------------------|
| Urinalysis _____     | Blood group _____ |
| PCV _____            | Genotype _____    |
| Hepatitis C _____    | Hepatitis B _____ |
| Pregnancy test _____ |                   |
| HCV _____            |                   |

1. Do you consider this student physically and emotionally capable of doing university work? \_\_\_\_\_
2. Is a normal class load advised? Yes \_\_\_\_\_ No \_\_\_\_\_ if No, please give reason: \_\_\_\_\_
3. Is any medical care to be continued while attending school? Yes \_\_\_\_\_ No \_\_\_\_\_
4. Is there any reason why this person should not take the regular physical education classes? Yes \_\_\_\_\_ No \_\_\_\_\_ if Yes, please give reason \_\_\_\_\_
5. Remarks (any special health problems or precautions) \_\_\_\_\_

Date of this examination: \_\_\_\_\_

Signature of physician: \_\_\_\_\_

Name of Physician: \_\_\_\_\_

Address: \_\_\_\_\_
