# Supplementary material for: Hypertension among adolescents in Nigeria: a retrospective study of adolescent university freshmen
Source: publisher site journal article supplement (doi:10.1515/ijamh-2018-0287), 2019-03-15
Supplement: Supplementary file 1 [file Supplementary Table.docx]

Supplementary table 1: Correlation between selected clinical and anthropometric characteristics of Nigerian adolescents

| **Characteristics** | **SBP** | **DBP** | **sys_per** | **dia_per** | **ɀBMI** | **WHtR** | **Height** | **Weight** | **wc** |
| --- | --- | --- | --- | --- | --- | --- | --- | --- | --- |
| **SBP** | 1.000 |  |  |  |  |  |  |  |  |
| **DBP** | 0.420 [<0.001] | 1.000 |  |  |  |  |  |  |  |
| **sys_per** | 0.900 [<0.001] | 0.420 [<0.001] | 1.000 |  |  |  |  |  |  |
| **dia_per** | 0.356 [<0.001] | 0.944 [<0.001] | 0.422 [<0.001] | 1.000 |  |  |  |  |  |
| **ɀBMI** | 0.223[<0.001] | 0.155 [<0.001] | 0.262 [<0.001] | 0.166 [<0.001] | 1.000 |  |  |  |  |
| **WHtR** | 0.146 [<0.001] | 0.197[<0.001] | 0.173 [<0.001] | 0.205 [<0.001] | 0.654 [<0.001] | 1.000 |  |  |  |
| **Height** | 0.305 [<0.001] | 0.046 [0.0001] | 0.049 [<0.001] | -0.142 [<0.001] | -0.057 [<0.001] | -0.114 [<0.001] | 1.000 |  |  |
| **Weight** | 0.356 [<0.001] | 0.212 [<0.001] | 0.247 [<0.001] | 0.120 [<0.001] | 0.799 [<0.001] | 0.604 [<0.001] | 0.421 [<0.001] | 1.000 |  |
| **wc** | 0.254 [<0.001] | 0.210 [<0.001] | 0.186 [<0.001] | 0.149 [<0.001] | 0.617 [<0.001] | 0.930 [<0.001] | 0.256 [<0.001] | 0.744 [<0.001] | 1.000 |

sys_bp (SBP percentiles) dia_per (DBP percentiles); wc (Waist circumference)
